# Supplementary material for: Distributions of Cranial Pathologies Provide Evidence for Head-Butting in Dome-Headed Dinosaurs (Pachycephalosauridae)
Source: PLOS journal article supplement (doi:10.1371/journal.pone.0068620), 2013-07-16
Supplement: S3 (10.1371/journal.pone.0068620.s003) [file journal.pone.0068620.s003]

TMP1992.2.3

*Stegoceras* sp.

25th January 2012

temp.u3d
