# Supplementary material for: Distributions of Cranial Pathologies Provide Evidence for Head-Butting in Dome-Headed Dinosaurs (Pachycephalosauridae)
Source: PLOS journal article supplement (doi:10.1371/journal.pone.0068620), 2013-07-16
Supplement: S5 (10.1371/journal.pone.0068620.s005) [file journal.pone.0068620.s005]

TMP79.14.853

Hanssuesia sternbergi

25th January 2012

temp.u3d
